# Supplementary material for: Manipulation of monomer-aggregate transformation of a heptamethine cyanine ligand: near infrared chromogenic recognition of Hg2+
Source: Royal Society of Chemistry journal article supplement (doi:10.1039/c7ra03517a), 2017-01-01
Supplement: c7ra03517a1.pdf [file c7ra03517a1.pdf]

## Supporting information

# Manipulation of Monomer-Dimer Transformation of a Heptamethine Cyanine Ligand: Near Infrared Chromogenic Recognition of Hg<sup>2+</sup>

Xia Gao<sup>a</sup>, Weidong Wu<sup>a</sup>, Jinyan Xi, Hong Zheng<sup>b\*</sup>

<sup>a</sup> School of Public Health, Xinxiang Medical University, 453003, Xinxiang, PR China

<sup>b</sup> Department of Chemistry, College of Chemistry and Chemical Engineering, Xiamen University, 361005, Xiamen, PR China

E-mail address: hzheng@xmu.edu.cn

### CONTENTS

|                                                                             |   |
|-----------------------------------------------------------------------------|---|
| Fig.S1. <sup>1</sup> H NMR of compound <b>2</b> .                           | 2 |
| Fig.S2. <sup>13</sup> C NMR of compound <b>2</b> .                          | 3 |
| Fig.S3. ESI mass spectra of compound <b>2</b> .                             | 4 |
| Fig.S4. <sup>1</sup> H NMR of compound <b>CyL</b> .                         | 5 |
| Fig.S5. <sup>13</sup> C NMR of compound <b>CyL</b> .                        | 6 |
| Fig.S6. ESI mass spectra of compound <b>CyL</b> .                           | 7 |
| Fig.S7. Competitive absorbance response of <b>CyL</b> with Hg <sup>2+</sup> | 7 |
| Fig.S8. Absorbance titrations of <b>CyL</b> with Hg <sup>2+</sup>           | 8 |
| Fig.S9. ESI mass spectra of <b>CyL</b> -Hg <sup>2+</sup>                    | 8 |

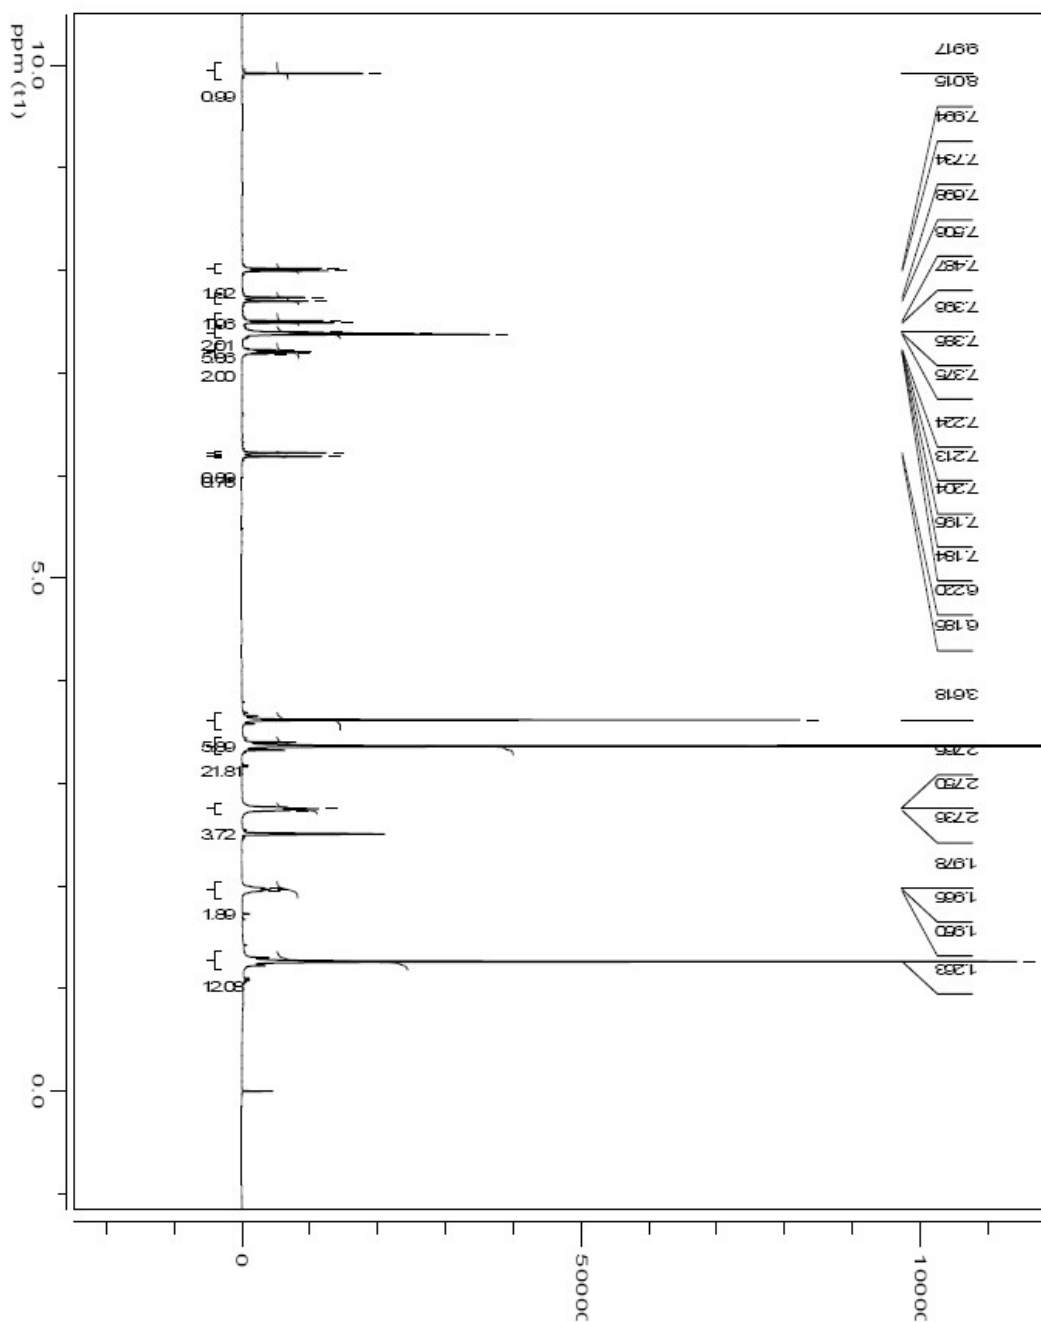

**Fig. S1**  $^1\text{H}$  NMR spectra of compound 2 ( $\text{d}_6\text{-DMSO}$ , 400 MHz). 3.36 (s,  $\text{H}_2\text{O}$ ), 2.51(S, DMSO residual peak).

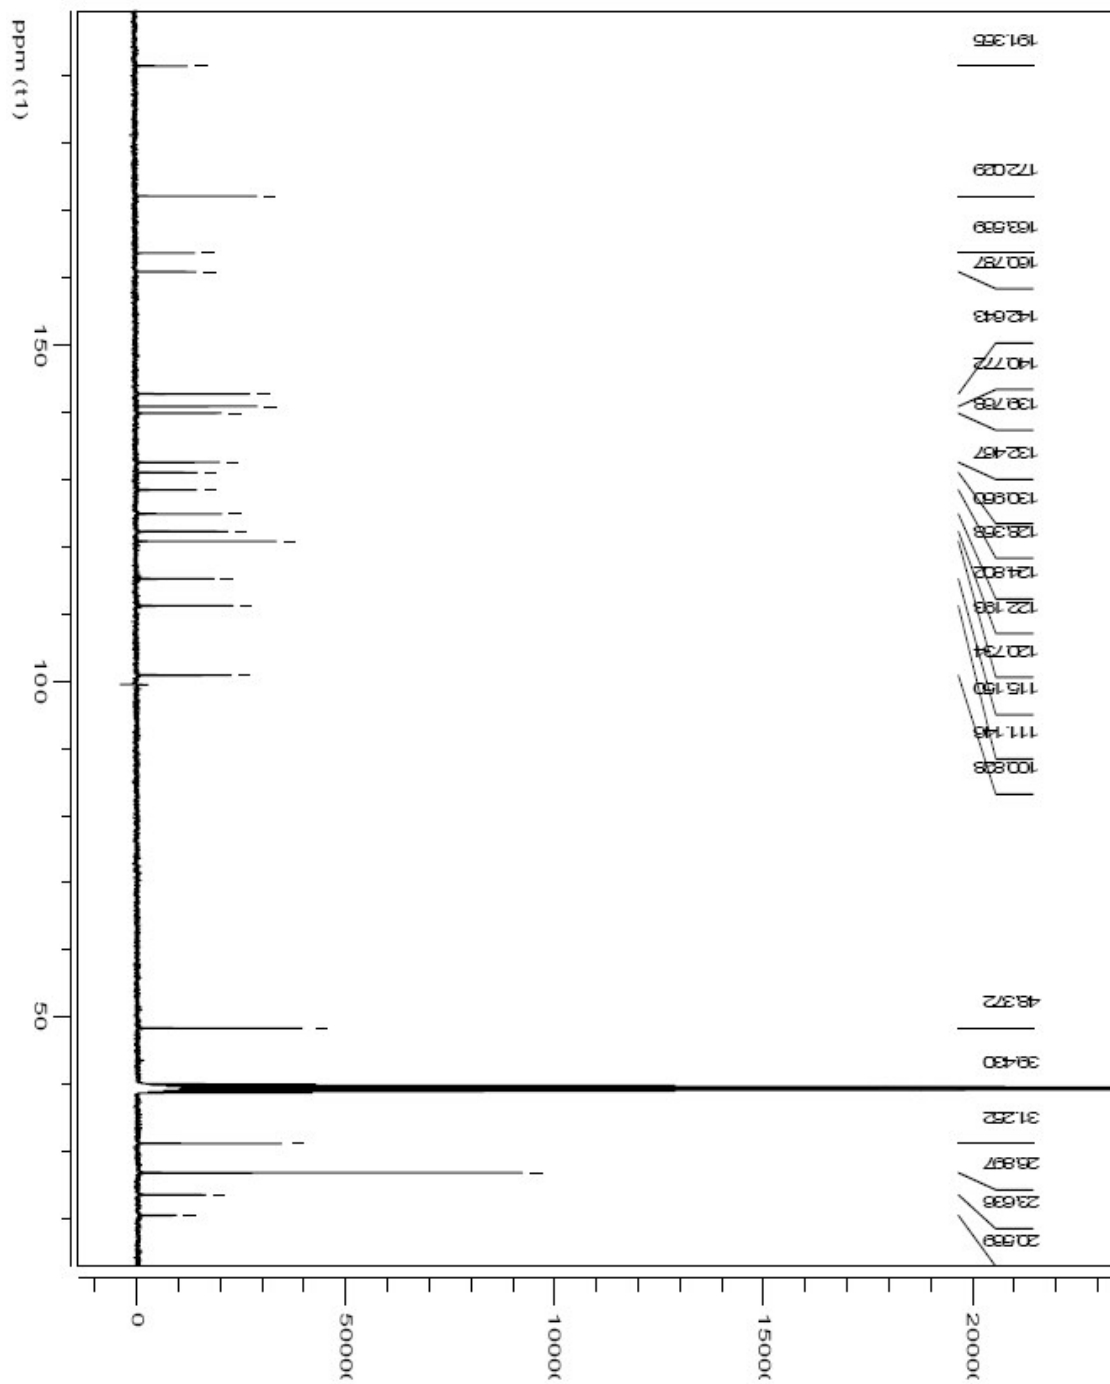

**Fig. S2** <sup>13</sup>C NMR spectra of compound **2** (d<sub>6</sub>-DMSO, 100 MHz)

S#: 56 RT: 1.04 AV: 1 NL: 6.26E5  
T: + c Full ms [ 50.00 - 2000.00]

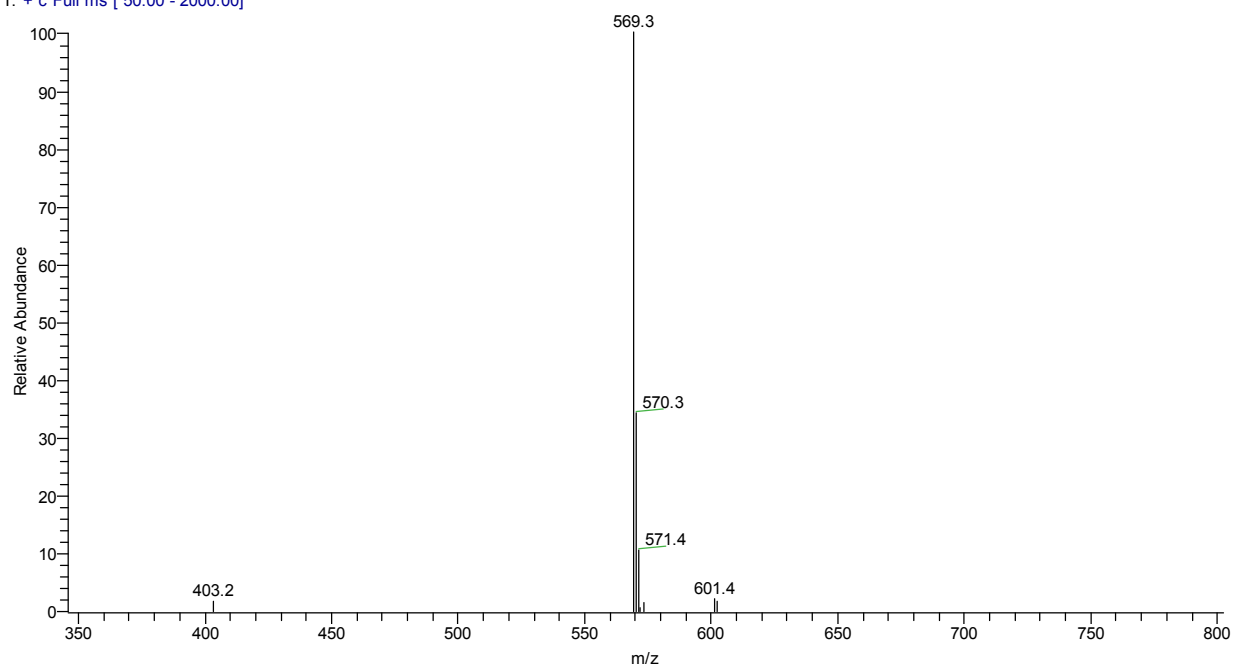

**Fig. S3** ESI mass spectra of compound 2.

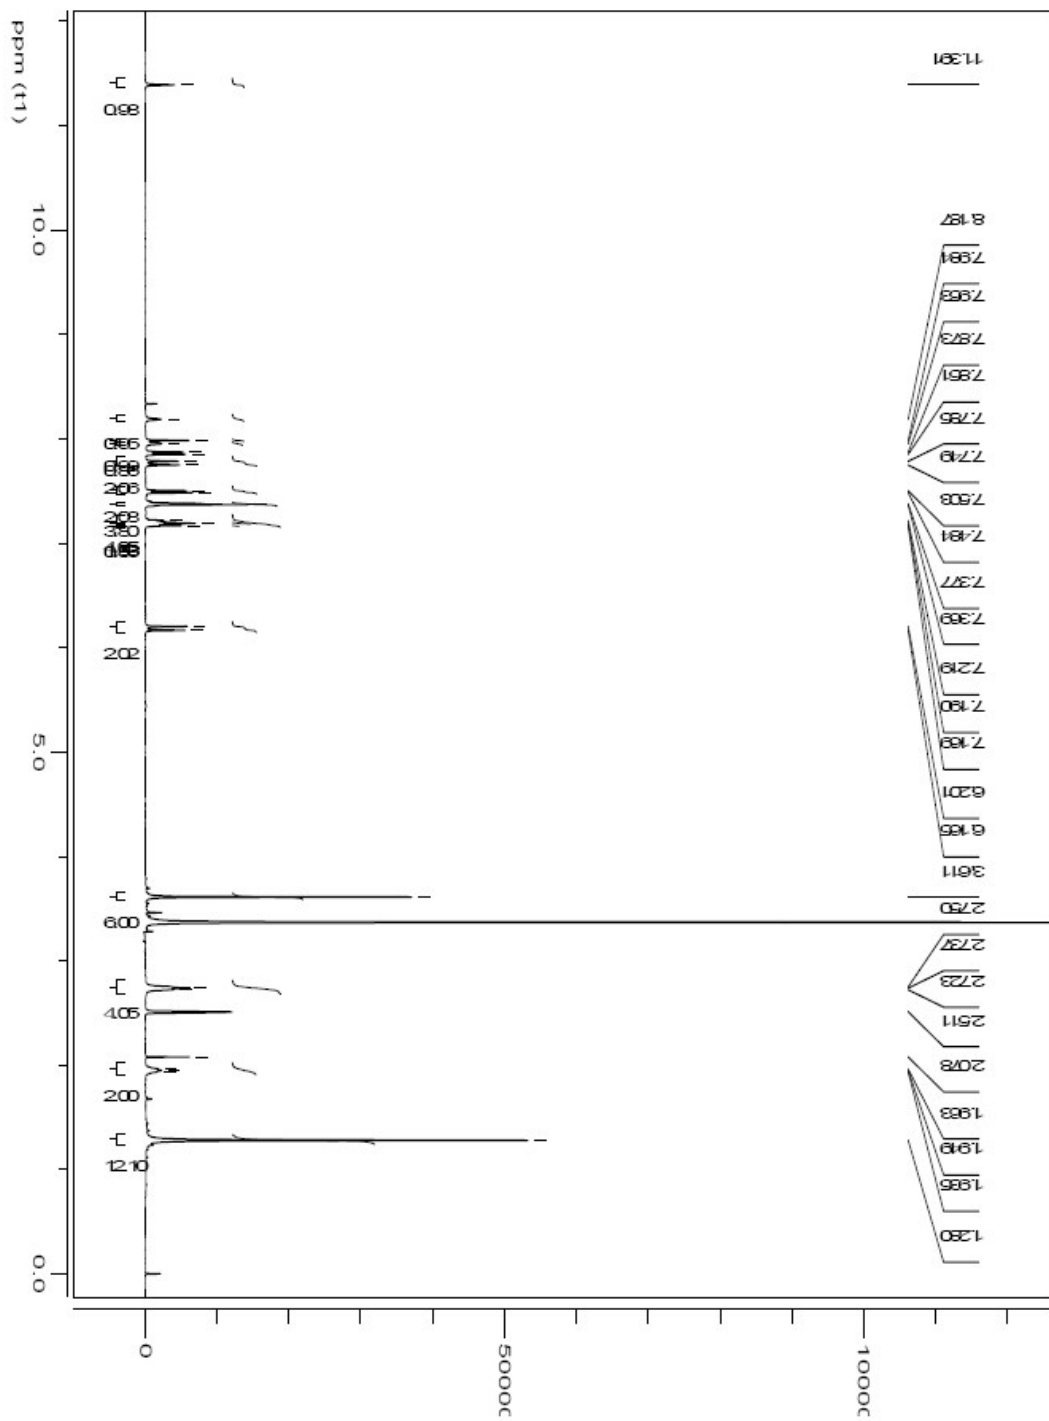

**Fig. S4** <sup>1</sup>H NMR spectra of CyL (d<sub>6</sub>-DMSO, 400 MHz). 3.36 (s, H<sub>2</sub>O), 2.51 (s, DMSO residual peak).

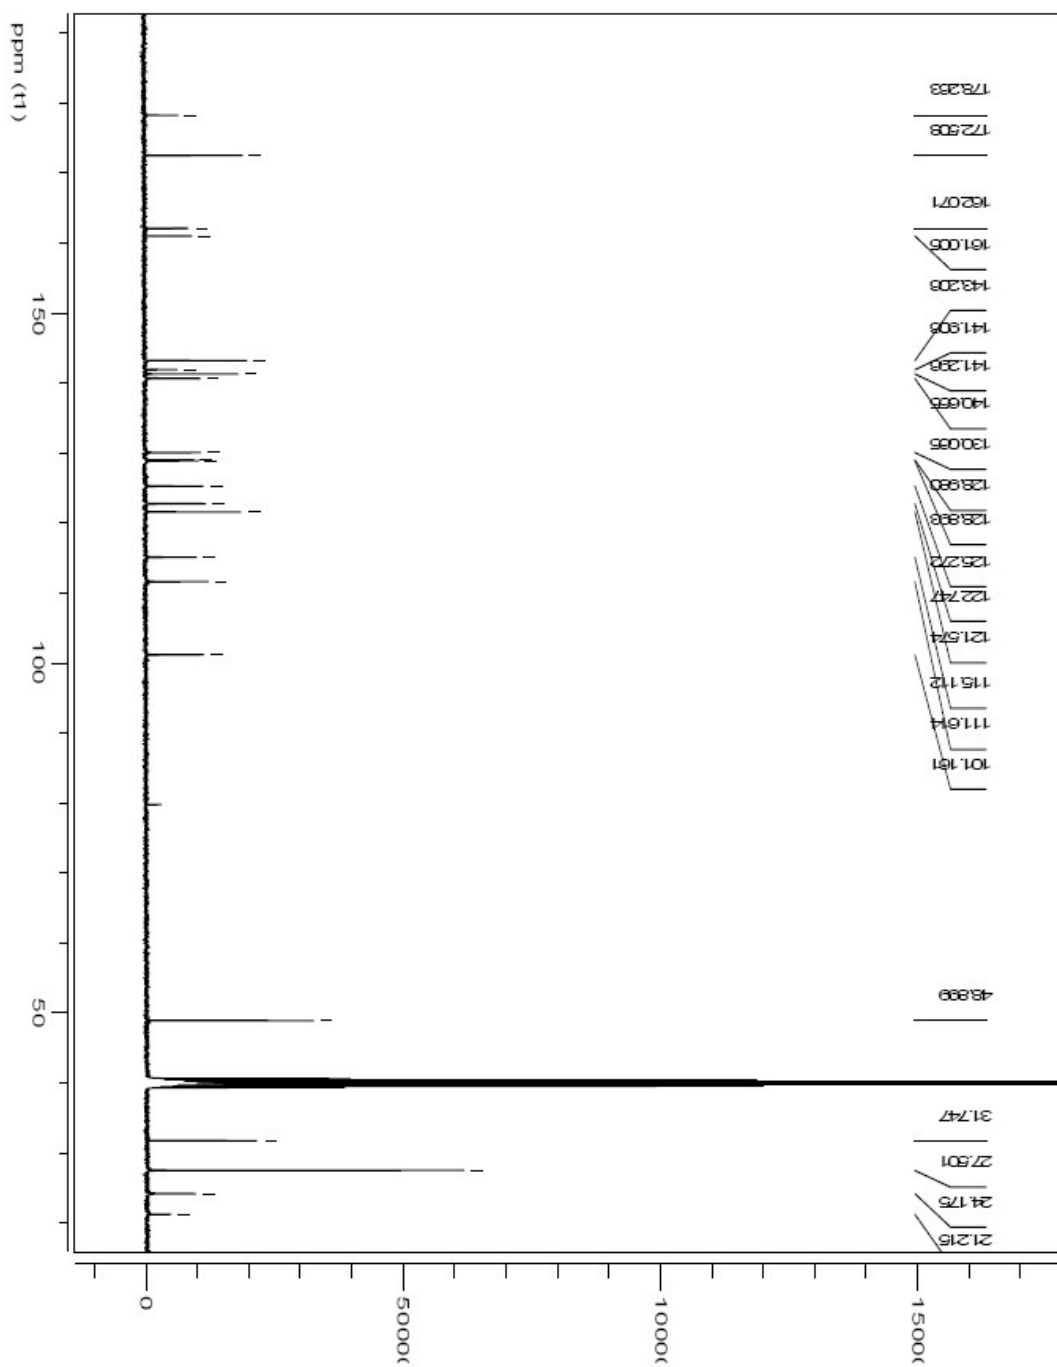

**Fig. S5**  $^{13}\text{C}$  NMR spectra of CyL ( $\text{d}_6\text{-DMSO}$ , 100 MHz)

S#: 17 RT: 0.45 AV: 1 NL: 1.92E5  
T: + c Full ms [ 50.00 - 2000.00]

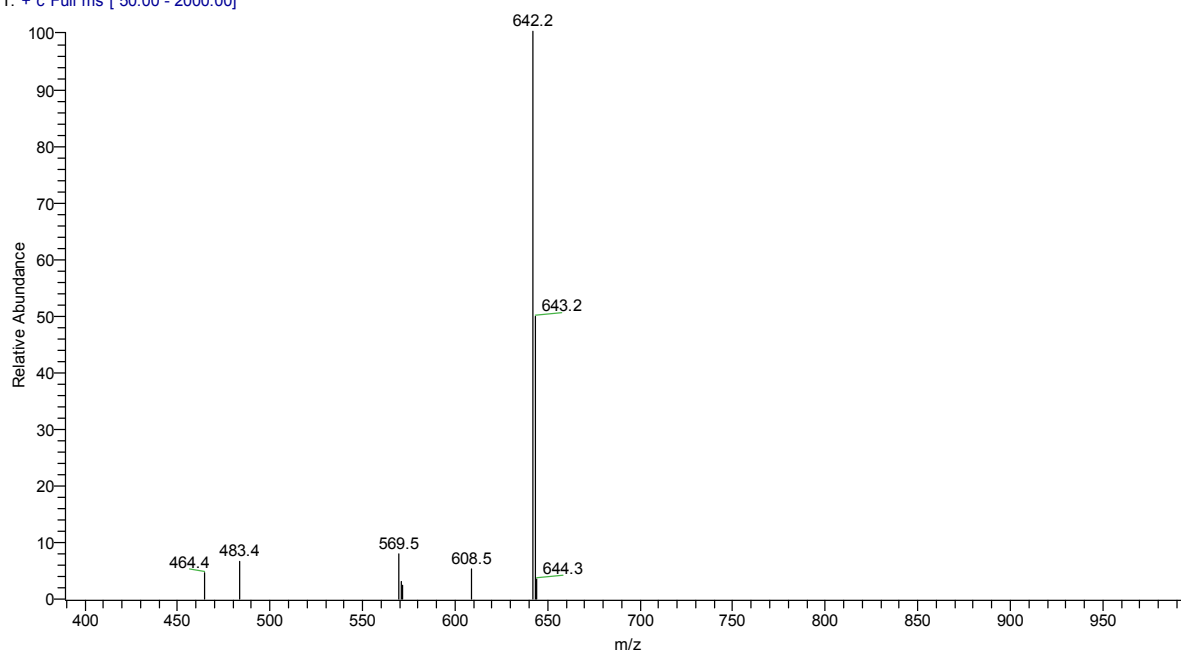

**Fig. S6** ESI mass spectra of compound CyL.

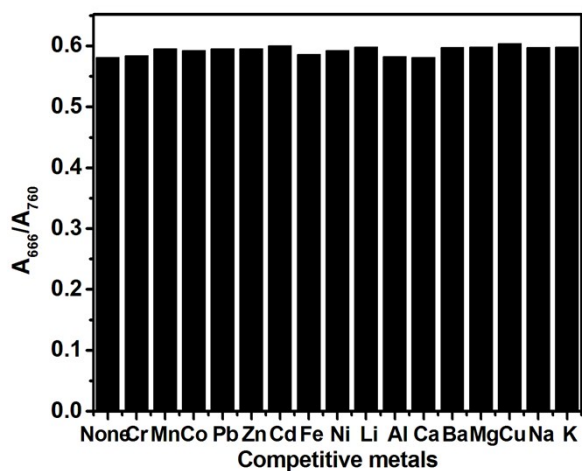

**Fig. S7** The absorbance response of CyL to  $Hg^{2+}$  ( $1.0 \times 10^{-5}$  M) in the presence of competitive metal ions (From left to right: no competitive cation (none),  $Li^+$  (100 equiv.),  $Na^+$  (100 equiv.),  $K^+$  (100 equiv.),  $Cr^{3+}$  (40 equiv.),  $Mn^{2+}$  (40 equiv.),  $Co^{2+}$  (40 equiv.),  $Pb^{2+}$  (40 equiv.),  $Zn^{2+}$  (40 equiv.),  $Cd^{2+}$  (40 equiv.),  $Fe^{3+}$  (40 equiv.),  $Ni^{2+}$  (40 equiv.),  $Al^{3+}$  (40 equiv.),  $Ca^{2+}$  (100 equiv.),  $Ba^{2+}$  (100 equiv.),  $Mg^{2+}$  (100 equiv.),  $Cu^{2+}$  (20 equiv.).

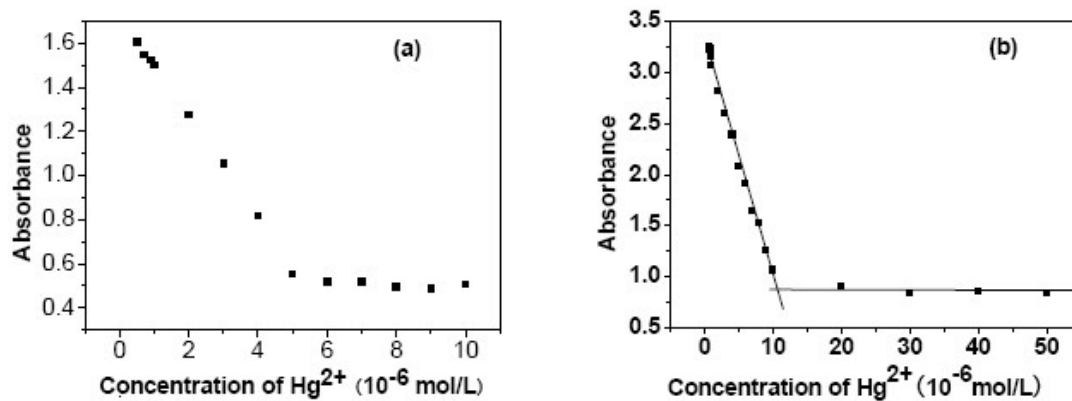

**Fig S8** Absorbance titrations of CyL with  $\text{Hg}^{2+}$  in aqueous solution of pH 4.00 at 760 nm. (a)  $[\text{CyL}] = 1.0 \times 10^{-5}$  M ; (b)  $[\text{CyL}] = 2.0 \times 10^{-5}$  M

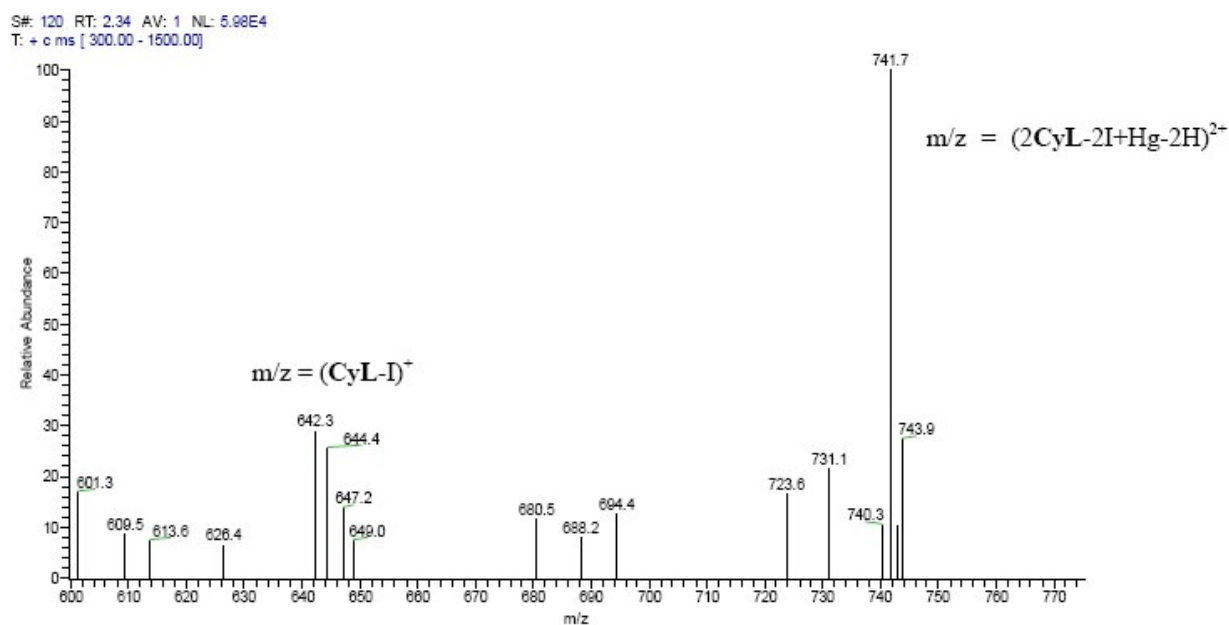

**Fig. S9** ESI mass spectra of the reaction products of CyL with  $\text{Hg}^{2+}$  in pH 4.00 acetate buffer solution.  $m/z$  (741.7):  $[2\text{CyL}-2\text{I}+\text{Hg}-2\text{H}]^{2+}$  for  $\text{Hg}(\text{CyL})_2$  complex;  $m/z$  (642.3):  $[\text{CyL}-\text{I}]^+$  for CyL monomer.
